# Supplementary material for: Suppression of Staphylococcus aureus biofilm formation and virulence by a benzimidazole derivative, UM-C162
Source: PubMed Central journal article supplement (PMC5807447; doi:10.1038/s41598-018-21141-2), 2018-02-09
Supplement: 41598_2018_21141_MOESM1_ESM.pdf [file 41598_2018_21141_MOESM1_ESM.pdf]

## **Supplementary Information**

**Suppression of *Staphylococcus aureus* biofilm formation and virulence by a benzimidazole derivative, UM-C162**

**Cin Kong, Chin Fei Chee, Katharina Richter, Nicky Thomas, Noorsaadah Abd.**

**Rahman & Sheila Nathan**

**Table S1. Details of all benzimidazole compounds used in anti-infective screen.**

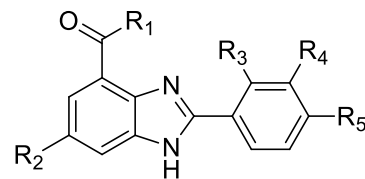

**General Scheme**

| No. | ID     | Molecular weight | R <sub>1</sub>  | R <sub>2</sub>  | R <sub>3</sub> | R <sub>4</sub> | R <sub>5</sub>                                                                        | Molecular structure                                                                   |
|-----|--------|------------------|-----------------|-----------------|----------------|----------------|---------------------------------------------------------------------------------------|---------------------------------------------------------------------------------------|
| 1   | UM-C12 | 313.12           | NH <sub>2</sub> | H               | H              | H              |    |   |
| 2   | UM-C13 | 327.14           | NH <sub>2</sub> | CH <sub>3</sub> | H              | H              |  |  |
| 3   | UM-C14 | 267.10           | NH <sub>2</sub> | H               | H              | H              | OCH <sub>3</sub>                                                                      |  |

|   |        |        |                 |                 |   |   |                  |  |
|---|--------|--------|-----------------|-----------------|---|---|------------------|--|
| 4 | UM-C15 | 281.12 | NH <sub>2</sub> | CH <sub>3</sub> | H | H | OCH <sub>3</sub> |  |
| 5 | UM-C16 | 305.08 | NH <sub>2</sub> | H               | H | H | CF <sub>3</sub>  |  |
| 6 | UM-C17 | 319.09 | NH <sub>2</sub> | CH <sub>3</sub> | H | H | CF <sub>3</sub>  |  |
| 7 | UM-C19 | 276.10 | NH <sub>2</sub> | CH <sub>3</sub> | H | H | CN               |  |
| 8 | UM-C41 | 329.13 | NH <sub>2</sub> | H               | H | H |                  |  |
| 9 | UM-C42 | 314.12 | NH <sub>2</sub> | H               | H | H |                  |  |

|    |        |        |                 |                 |   |   |                                                                                       |                                                                                       |
|----|--------|--------|-----------------|-----------------|---|---|---------------------------------------------------------------------------------------|---------------------------------------------------------------------------------------|
| 10 | UM-C43 | 411.17 | NH <sub>2</sub> | H               | H | H | 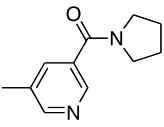   |    |
| 11 | UM-C44 | 425.19 | NH <sub>2</sub> | CH <sub>3</sub> | H | H |    |    |
| 12 | UM-C45 | 411.17 | NH <sub>2</sub> | H               | H | H |    |    |
| 13 | UM-C46 | 425.19 | NH <sub>2</sub> | CH <sub>3</sub> | H | H |    |   |
| 14 | UM-C47 | 314.12 | NH <sub>2</sub> | H               | H | H |  |  |

|    |         |        |                 |                 |   |   |                                                                                       |                                                                                       |
|----|---------|--------|-----------------|-----------------|---|---|---------------------------------------------------------------------------------------|---------------------------------------------------------------------------------------|
| 15 | UM-C48  | 370.14 | NH <sub>2</sub> | H               | H | H | 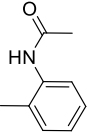   |    |
| 16 | UM-C49  | 370.14 | NH <sub>2</sub> | H               | H | H |    |    |
| 17 | UM-C50  | 370.14 | NH <sub>2</sub> | H               | H | H |    |    |
| 18 | UM-C73  | 410.17 | NH <sub>2</sub> | H               | H | H |    |    |
| 19 | UM-C74  | 424.19 | NH <sub>2</sub> | CH <sub>3</sub> | H | H |  |   |
| 20 | UM-C109 | 371.14 | NH <sub>2</sub> | H               | H | H |  |  |

|    |         |        |                 |                 |   |      |                                                                                       |                                                                                       |
|----|---------|--------|-----------------|-----------------|---|------|---------------------------------------------------------------------------------------|---------------------------------------------------------------------------------------|
| 21 | UM-C110 | 397.19 | NH <sub>2</sub> | H               | H | H    | 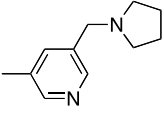   |    |
| 22 | UM-C137 | 385.14 | OH              | CH <sub>3</sub> | H | H    |    |    |
| 23 | UM-C138 | 385.14 | OH              | CH <sub>3</sub> | H | H    |    |    |
| 24 | UM-C139 | 385.14 | OH              | CH <sub>3</sub> | H | H    |    |    |
| 25 | UM-C162 | 491.18 | OH              | CH <sub>3</sub> | H | H    |  |   |
| 26 | UM-C163 | 385.14 | OH              | CH <sub>3</sub> | H | NHAc |  |  |

|    |         |        |                 |                 |   |   |                                                                                       |                                                                                       |
|----|---------|--------|-----------------|-----------------|---|---|---------------------------------------------------------------------------------------|---------------------------------------------------------------------------------------|
| 27 | UM-C164 | 454.24 | NH <sub>2</sub> | H               | H | H | 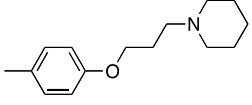   |    |
| 28 | UM-C187 | 491.18 | OH              | CH <sub>3</sub> | H | H |    |    |
| 29 | UM-C188 | 491.18 | OH              | CH <sub>3</sub> | H | H |    |    |
| 30 | UM-C189 | 440.22 | NH <sub>2</sub> | H               | H | H |    |    |
| 31 | UM-C201 | 450.13 | NH <sub>2</sub> | F               | F | H |  |  |
| 32 | UM-C202 | 402.15 | NH <sub>2</sub> | F               | H | H |  |  |

|    |         |        |                 |   |   |   |                                                                                     |                                                                                     |
|----|---------|--------|-----------------|---|---|---|-------------------------------------------------------------------------------------|-------------------------------------------------------------------------------------|
| 33 | UM-C203 | 432.14 | NH <sub>2</sub> | F | F | H | 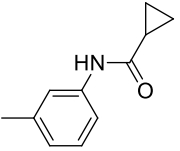 |  |
| 34 | UM-C204 | 462.15 | NH <sub>2</sub> | F | F | H |  |  |
| 35 | UM-C205 | 444.16 | NH <sub>2</sub> | F | H | H |  |  |



Figure S1.

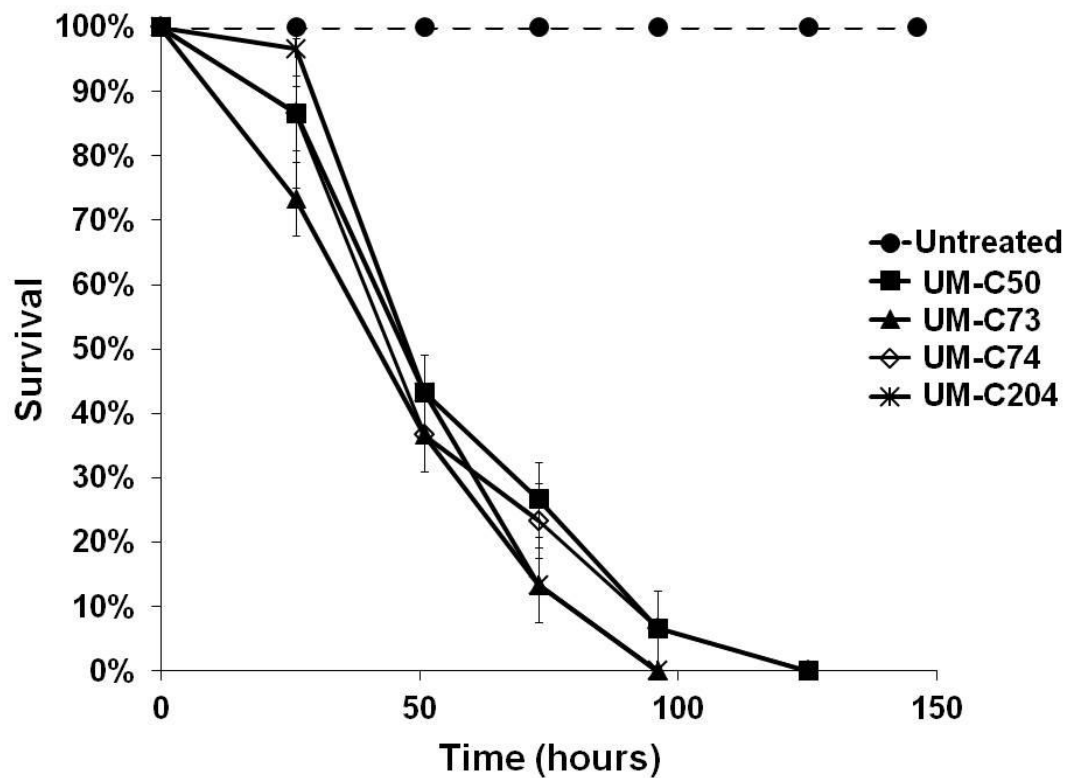

Figure S1. Survival of *C. elegans* fed on heat-killed *E. coli* OP50 in the presence of compounds UM-C50, UM-C73, UM-C74 and UM-C204. Shown is the representative of two independent replicates (n=120). All compounds were tested at 100  $\mu$ M.

**Figure S2.**

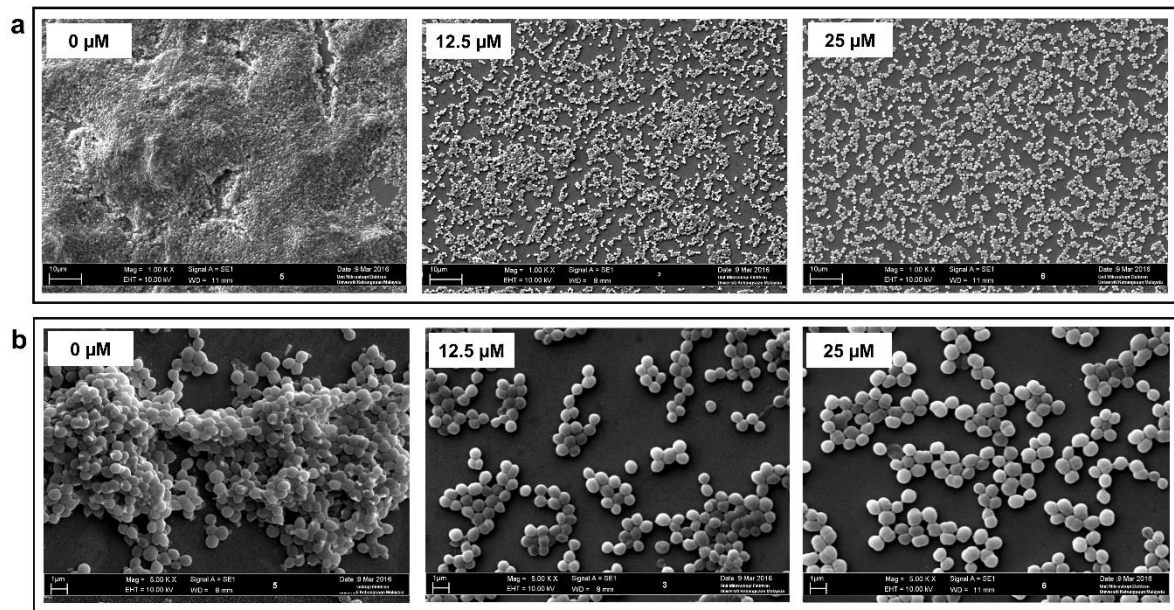

**Figure S2. Scanning electron microscopy micrographs of the *S. aureus* biofilm structure at higher concentrations. (a) Biofilm formation by untreated (0 μM) and UM-C162-treated *S. aureus* (12.5 μM and 25 μM) following 24 hours incubation (1000x magnification). (b) Bacterial cells cluster in untreated *S. aureus* (0 μM) and the absence of cell aggregates in UM-C162-treated bacteria (12.5 μM and 25 μM) under 5000x magnification.**

**Figure S3.**

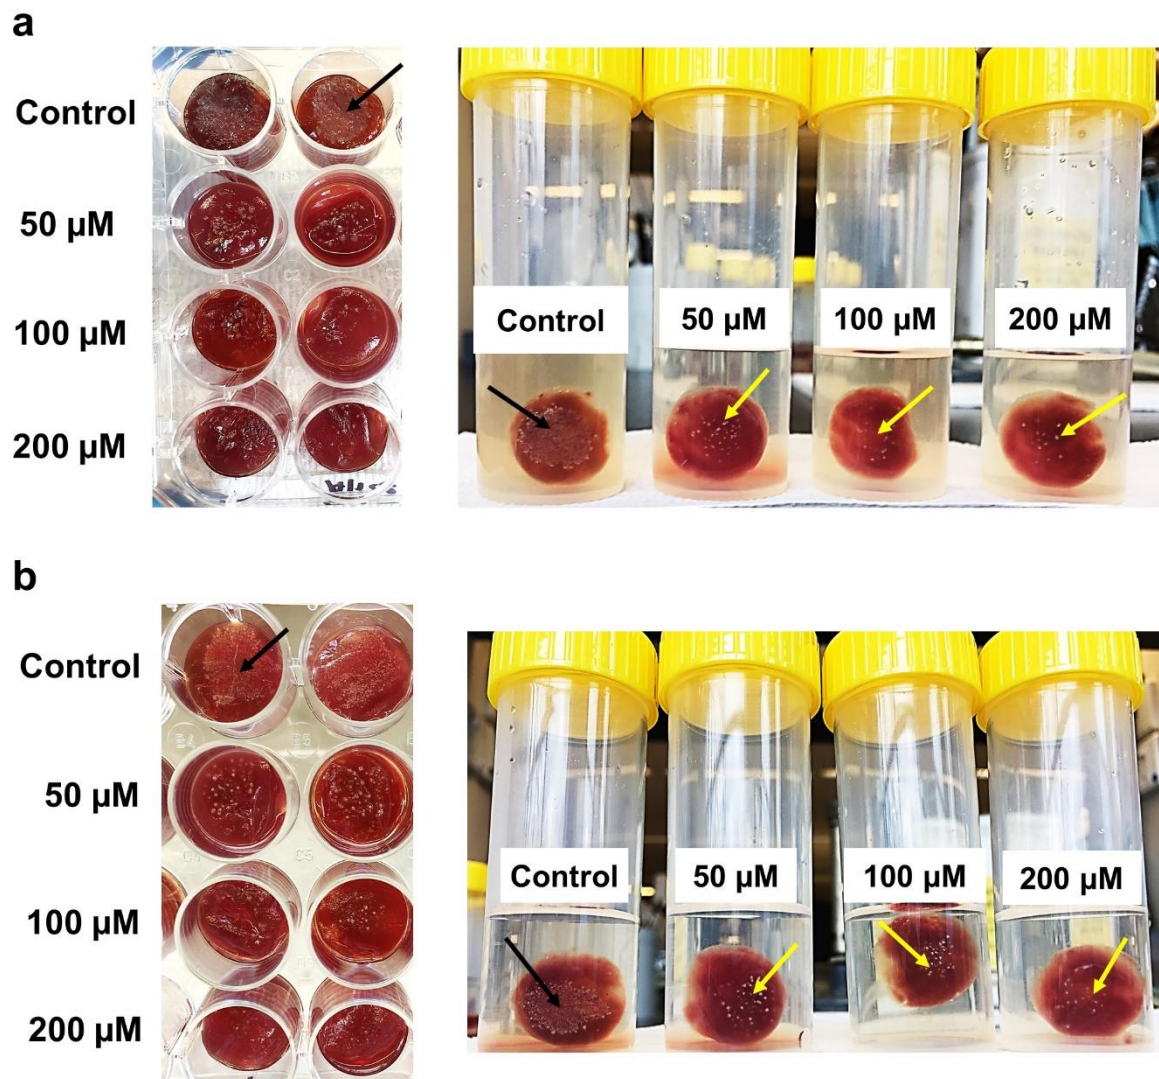

**Figure S3. UM-C162 prevents the growth of *S. aureus* and MRSA biofilm in an artificial dermis wound model. Biofilm formation of *S. aureus* (a) and MRSA (b) after exposure to 50  $\mu\text{M}$ , 100  $\mu\text{M}$  and 200  $\mu\text{M}$  of UM-C162. Black arrows indicate the formation of thick biofilm attached to the untreated infected dermis (control) whilst yellow arrows show the absence of biofilm on UM-C162-treated dermis.**

**Figure S4.**

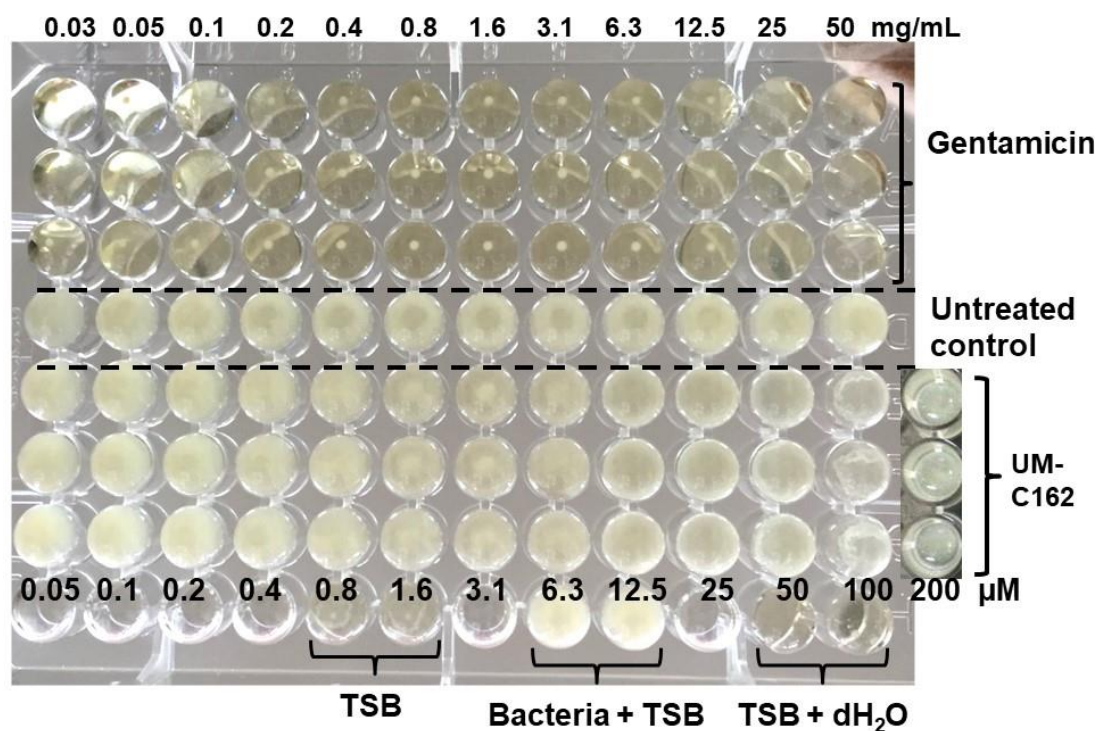

**Figure S4. UM-C162 exhibits no antimicrobial effect on *S. aureus*.** At UM-C162 concentrations ranging from 0.05 to 200 μM, bacterial growth can be detected in all wells as reflected by the cloudy appearance in the wells. On the other hand, the wells supplemented with the antibiotic gentamicin from 0.03 to 50 mg/mL appear to be clear, indicating a MIC at <30 μg/mL. The untreated control consisting of only the bacteria culture and the dissolving solvent, DMSO, shows apparent bacterial growth whilst the blank controls (TSB only and TSB + dH<sub>2</sub>O) are clear after overnight incubation, indicating no bacterial growth.

**Table S2: 456 *S. aureus* genes differentially modulated by treatment of UM-C162 as compared to untreated *S. aureus*.**

| <b>Affymetrix probe ID</b> | <b>ORF</b>    | <b>Gene symbol</b> | <b>Description</b>                                 | <b>Fold change</b> | <b>P value</b> |
|----------------------------|---------------|--------------------|----------------------------------------------------|--------------------|----------------|
| sa_c10648s11101_s_at       | SAOUHSC_01311 |                    | ABC transporter, ATP-binding protein, putative     | 294.62             | 0.000722       |
| sa_c1633s1367_a_at         | SAOUHSC_01312 |                    | Putative uncharacterized protein                   | 125.66             | 0.000353       |
| sa_i11106u_x_at            | SAOUHSC_01626 |                    | Proline dipeptidase, putative                      | 102                | 0.000038       |
| sa_i3075u_x_at             | SAOUHSC_01966 |                    | Putative uncharacterized protein                   | 18.68              | 0.042623       |
| sa_c5329s4605_a_at         | SAOUHSC_02646 |                    | Putative uncharacterized protein                   | 16.51              | 0.003238       |
| sa_c5323s4600_a_at         | SAOUHSC_02645 |                    | Uncharacterized HTH-type transcriptional regulator | 15.1               | 0.004226       |
| sa_c1639s1378_a_at         | SAOUHSC_01314 |                    | Putative uncharacterized protein                   | 12.71              | 0.000009       |
| sa_c1635s1372_a_at         | SAOUHSC_01313 |                    | DNA gyrase B                                       | 10.69              | 0.000209       |
| sa_i11195d_x_at            | SAOUHSC_02033 |                    | Phage tape measure protein                         | 9.94               | 0.045438       |
| sa_c10392s10798_at         | SAOUHSC_02028 |                    | PhiETA ORF57-like protein                          | 8.33               | 0.027419       |
| sa_i3492ur_x_at            | SAOUHSC_01118 |                    | Putative uncharacterized protein                   | 8.31               | 0.035735       |
| sa_c1593s9635_at           | SAOUHSC_01296 |                    | Putative uncharacterized protein                   | 7.38               | 0.029201       |
| sa_c3043s2596_a_at         | SAOUHSC_00136 |                    | Putative uncharacterized protein                   | 6.96               | 0.024461       |
| sa_c10374s10766_x_at       | SAOUHSC_01925 |                    | Putative uncharacterized protein                   | 6.72               | 0.012236       |
| sa_c10704s11153_at         | SAV0399       |                    | Uncharacterized protein                            | 6.6                | 0.04078        |
| sa_i3055u_x_at             | SAOUHSC_01959 |                    | Putative uncharacterized protein                   | 6.58               | 0.006938       |
| sa_i4210u_x_at             | SAOUHSC_02518 |                    | Putative uncharacterized protein                   | 6.54               | 0.049286       |
| sa_c5640s9379_a_at         | SAOUHSC_02701 |                    | Putative uncharacterized protein                   | 6.53               | 0.004158       |
| sa_c10269s10678_at         |               | set6               | Exotoxin 6                                         | 6.46               | 0.020335       |
| sa_c1561s9623_at           | SACOL1586     |                    | Uncharacterized protein                            | 6.38               | 0.036715       |
| sa_c4556s9980_x_at         | SAV2151       |                    | Uncharacterized protein                            | 6.29               | 0.040922       |
| sa_c6443s5614_a_at         | SAOUHSC_02943 |                    | Citrate transporter, putative                      | 6.27               | 0.019834       |
| sa_c10708s11157_at         | SAV0403       |                    | Uncharacterized protein                            | 6.19               | 0.000759       |
| sa_c192s9522_a_at          | SA0055        |                    | Uncharacterized protein                            | 5.98               | 0.002413       |
| sa_c9963s8658_a_at         | SACOL2240     | rpsJ               | 30S ribosomal protein S10                          | 5.97               | 0.004152       |

|                      |                 |       |                                                            |      |          |
|----------------------|-----------------|-------|------------------------------------------------------------|------|----------|
| sa_c7338s6377_a_at   | SAOUHSC_00412   |       | NADH dehydrogenase subunit 5, putative                     | 5.93 | 0.00556  |
| sa_c4852s4158_at     | SAOUHSC_02501   | rplX  | 50S ribosomal protein L24                                  | 5.71 | 0.004857 |
| sa_c740s548_a_at     | SAOUHSC_01032   |       | Cytochrome d ubiquinol oxidase, subunit II, putative       | 5.68 | 0.002142 |
| sa_c6929s10116_at    | SAOUHSC_00282   |       | Branched-chain amino acid transport system carrier protein | 5.59 | 0.024382 |
| sa_c10713s11162_a_at | SAV0409         |       | Similar to DNA translocase FtsK                            | 5.55 | 0.006045 |
| sa_c2333s9718_x_at   | SAOUHSC_01544   |       | Hypothetical phage protein                                 | 5.31 | 0.044745 |
| sa_i7519ur_x_at      | SAOUHSC_00857   |       | Putative uncharacterized protein                           | 5.26 | 0.048948 |
| sa_c1603s9640_x_at   | SAOUHSC_01297   |       | Putative uncharacterized protein                           | 5.13 | 0.000505 |
| sa_c3941s3408_at     | SAOUHSC_02156   |       | Putative uncharacterized protein                           | 5.11 | 0.002968 |
| sa_c6147s5329_at     | SAOUHSC_02853   |       | Putative uncharacterized protein                           | 5.11 | 0.035804 |
| sa_c5600s4854_a_at   | SAOUHSC_02688   |       | Putative uncharacterized protein                           | 5.08 | 0.026249 |
| sa_c4836s4142_at     | SAOUHSC_02495   | rplR  | 50S ribosomal protein L18                                  | 4.97 | 0.010388 |
| sa_i2904u_x_at       | SAOUHSC_01883   |       | Putative uncharacterized protein                           | 4.96 | 0.000097 |
| sa_c2719s2293_at     | SAOUHSC_01689   | rpsT  | 30S ribosomal protein S20                                  | 4.82 | 0.001799 |
| sa_c4860s4166_at     | SAOUHSC_02504   | rpmC  | 50S ribosomal protein L29                                  | 4.77 | 0.003248 |
| sa_c7344s6381_a_at   | SAOUHSC_00413   |       | UPF0753 protein                                            | 4.74 | 0.009339 |
| sa_c1687s1419cv_at   | SAOUHSC_01651   | rpmG2 | 50S ribosomal protein L33 2                                | 4.71 | 0.017634 |
| sa_c9420s8234_a_at   | SAOUHSC_02932   | betA  | Oxygen-dependent choline dehydrogenase                     | 4.69 | 0.044798 |
| sa_c9925s10469_a_at  | SAOUHSC_02248   |       | Putative uncharacterized protein                           | 4.68 | 0.003941 |
| sa_c6694s5837_a_at   | SAOUHSC_03006.1 |       | Putative uncharacterized protein                           | 4.51 | 0.001026 |
| sa_c470s302_at       | SAOUHSC_00957   |       | Putative uncharacterized protein                           | 4.43 | 0.019245 |
| sa_c10191s8871_a_at  | SAOUHSC_02503   | rpsQ  | 30S ribosomal protein S17                                  | 4.36 | 0.023101 |
| sa_c3556s9823_at     |                 | sen   | Enterotoxin                                                | 4.26 | 0.004393 |
| sa_c736s544_a_at     | SAOUHSC_01031   |       | Cytochrome d ubiquinol oxidase, subunit I, putative        | 4.22 | 0.015548 |
| sa_c4515s3860_a_at   | SAOUHSC_02382   |       | Putative uncharacterized protein                           | 4.17 | 0.000753 |
| sa_c2144s1843_a_at   | SAOUHSC_01468   |       | Putative uncharacterized protein                           | 4.16 | 0.001124 |
| sa_c8637s7585_a_at   | SAOUHSC_00881   |       | Putative uncharacterized protein                           | 4.11 | 0.001074 |

|                            |               |             |                                                    |      |          |
|----------------------------|---------------|-------------|----------------------------------------------------|------|----------|
| sa_c1057s841_a_at          | SAOUHSC_01134 |             | Putative uncharacterized protein                   | 4.08 | 0.014532 |
| sa_i3133ur_x_at            | SAOUHSC_00154 |             | Putative uncharacterized protein                   | 4.07 | 0.009722 |
| sa_c4608s3937_a_at         | SAOUHSC_02419 | sepA        | Multidrug resistance efflux pump                   | 4.01 | 0.001444 |
| sa_c1551s9617_at           | SACOL1577     |             | Uncharacterized protein                            | 3.98 | 0.013428 |
| sa_c3487s9161_a_at         | SAOUHSC_01921 |             | Putative uncharacterized protein                   | 3.96 | 0.020848 |
| sa_c4005s9893_a_at         | SA1769        |             | Uncharacterized protein                            | 3.96 | 0.002281 |
| sa_i9270d_x_at             | SA2282        |             | Uncharacterized protein                            | 3.93 | 0.02794  |
| sa_c582s408_a_at           | SAOUHSC_00991 |             | Putative uncharacterized protein                   | 3.91 | 0.000549 |
| sa_c10524s10977cv_s_a<br>t | SAOUHSC_02838 |             | Putative uncharacterized protein                   | 3.88 | 0.047264 |
| sa_c10125s8848_a_at        | SAOUHSC_02157 |             | Putative uncharacterized protein                   | 3.8  | 0.032109 |
| sa_i10370ur_x_at           | SAOUHSC_03008 |             | Imidazole glycerol phosphate synthase subunit hisF | 3.76 | 0.014648 |
| sa_c10456s10893_a_at       | SAOUHSC_02206 |             | Hypothetical phage protein                         | 3.75 | 0.03835  |
| sa_c4081s3441_a_at         | SAOUHSC_00171 |             | Gamma-glutamyltranspeptidase, putative             | 3.7  | 0.013464 |
| sa_c9067s7955_a_at         | SAOUHSC_00965 |             | Putative uncharacterized protein                   | 3.69 | 0.000307 |
| sa_c9955s8651_a_at         | SAOUHSC_02502 | rplN        | 50S ribosomal protein L14                          | 3.68 | 0.005626 |
| sa_c4876s4184_at           | SAOUHSC_02508 | rpsS        | 30S ribosomal protein S19                          | 3.63 | 0.005576 |
| sa_c4880s4187_at           | SAOUHSC_02511 | rplD        | 50S ribosomal protein L4                           | 3.61 | 0.024593 |
| sa_c1175s958_a_at          | SAOUHSC_01173 |             | Putative uncharacterized protein                   | 3.6  | 0.003386 |
| sa_c4868s4175_a_at         | SAOUHSC_02506 | rpsC        | 30S ribosomal protein S3                           | 3.58 | 0.00532  |
| sa_c4888s4195_a_at         | SAOUHSC_02512 | rplC        | 50S ribosomal protein L3                           | 3.53 | 0.04621  |
| sa_c3294s2837_at           | SAOUHSC_01863 |             | Putative uncharacterized protein                   | 3.5  | 0.010165 |
| sa_c4844s4152_at           | SAOUHSC_02499 | rpsZ; rpsN1 | 30S ribosomal protein S14 type Z                   | 3.5  | 0.005675 |
| sa_c10228s8907_a_at        | SAOUHSC_02794 |             | Putative uncharacterized protein                   | 3.48 | 0.000348 |
| sa_c8951s10282_a_at        | SAOUHSC_01926 |             | Putative uncharacterized protein                   | 3.48 | 0.014332 |
| sa_c10598s11052_s_at       | SAOUHSC_02821 |             | Membrane spanning protein, putative                | 3.4  | 0.000838 |
| sa_c10192s8875_a_at        | SAOUHSC_02510 | rplW        | 50S ribosomal protein L23                          | 3.38 | 0.005162 |
| sa_c4840s4147_a_at         | SAOUHSC_02498 | rpsH        | 30S ribosomal protein S8                           | 3.38 | 0.005302 |
| sa_c7621s6634_a_at         | SAOUHSC_00520 | rplJ        | 50S ribosomal protein L10                          | 3.38 | 0.009176 |
| sa_c10325s10715cv_s_a      | SACOL1839     |             | Transposase, IS200 family                          | 3.37 | 0.016459 |

| t                   |                 |            |                                           |      |          |
|---------------------|-----------------|------------|-------------------------------------------|------|----------|
| sa_c6934s6055_a_at  | SAOUHSC_00284   |            | 5'-nucleotidase, lipoprotein e(P4) family | 3.36 | 0.011279 |
| sa_c4872s4181_at    | SAOUHSC_02507   | rplV       | 50S ribosomal protein L22                 | 3.32 | 0.006044 |
| sa_c5972s5179_a_at  | SAOUHSC_02795   |            | Putative uncharacterized protein          | 3.31 | 0.000386 |
| sa_i10774u_x_at     | SAOUHSC_00194   |            | Putative uncharacterized protein          | 3.28 | 0.00091  |
| sa_c1398s1173_at    | SAOUHSC_01247   | rbfA       | Ribosome-binding factor A                 | 3.27 | 0.004177 |
| sa_c9951s8647_at    | SAOUHSC_02496   | rplF       | 50S ribosomal protein L6                  | 3.18 | 0.009184 |
| sa_c1431s1205_a_at  | SAOUHSC_01256   |            | Putative uncharacterized protein          | 3.15 | 0.002842 |
| sa_c3188s2737_a_at  | SAOUHSC_01829   | rpsD       | 30S ribosomal protein S4                  | 3.1  | 0.010409 |
| sa_c3623s3103_a_at  | SAOUHSC_01979   |            | Putative uncharacterized protein          | 3.1  | 0.000122 |
| sa_c9601s8362_a_at  | SAOUHSC_01254   |            | Putative uncharacterized protein          | 3.07 | 0.006959 |
| sa_c1723s1460_a_at  | SAOUHSC_01340   |            | Putative uncharacterized protein          | 3.06 | 0.013175 |
| sa_c6495s5664_a_at  | SAOUHSC_02960   |            | Putative uncharacterized protein          | 3.04 | 0.017707 |
| sa_c9605s8367_a_at  | SAOUHSC_01238   |            | Phosphatidate cytidyltransferase          | 3.04 | 0.001187 |
| sa_c493s322_at      | SAOUHSC_00964   |            | Putative uncharacterized protein          | 3.03 | 0.003255 |
| sa_c537s363_a_at    | SAOUHSC_00978   |            | Putative uncharacterized protein          | 3.02 | 0.001623 |
| sa_c197s9528_at     | SACOL0040       |            | Uncharacterized protein                   | 3    | 0.039444 |
| sa_c1264s1041_at    | SAOUHSC_01201   | acpP; hmrB | Acyl carrier protein                      | 2.98 | 0.043614 |
| sa_c7365s6401_a_at  | SAOUHSC_00420   |            | Transporter                               | 2.98 | 0.002373 |
| sa_c9241s8090_a_at  | SAOUHSC_00182   |            | Putative uncharacterized protein          | 2.98 | 0.007723 |
| sa_c7832s10211_a_at | SAOUHSC_00584   |            | Putative uncharacterized protein          | 2.97 | 0.029183 |
| sa_c3428s2956_a_at  | SAOUHSC_01902   |            | Putative uncharacterized protein          | 2.96 | 0.001987 |
| sa_c7070s6181_a_at  | SAOUHSC_00330   |            | Putative uncharacterized protein          | 2.95 | 0.038993 |
| sa_i2636ur_x_at     | SAOUHSC_01800.1 |            | Putative uncharacterized protein          | 2.95 | 0.015923 |
| sa_c1711s1447_a_at  | SAOUHSC_01338   |            | UPF0154 protein                           | 2.94 | 0.003616 |
| sa_c4864s4170_at    | SAOUHSC_02505   | rplP       | 50S ribosomal protein L16                 | 2.94 | 0.014236 |
| sa_c2369s9745_at    | SAOUHSC_01556   |            | PVL orf 52-like protein                   | 2.93 | 0.022118 |
| sa_c813s612_a_at    | SAOUHSC_01051   |            | Putative uncharacterized protein          | 2.93 | 0.001716 |
| sa_i2573u_x_at      | SAOUHSC_01780   |            | Putative uncharacterized protein          | 2.93 | 0.00115  |
| sa_c1960s1685_a_at  | SACOL1438       |            | Uncharacterized protein                   | 2.92 | 0.003517 |



|                     |                 |       |                                                                    |      |          |
|---------------------|-----------------|-------|--------------------------------------------------------------------|------|----------|
| sa_c489s318_a_at    | SAOUHSC_00963   |       | Lipoate-protein ligase                                             | 2.9  | 0.001119 |
| sa_i7154ur_x_at     | SAOUHSC_00709   |       | Putative uncharacterized protein                                   | 2.9  | 0.025774 |
| sa_c152s9488_at     |                 | ermA  | rRNA adenine N-6-methyltransferase                                 | 2.88 | 0.044664 |
| sa_c6760s5903_a_at  | SAOUHSC_03023   | drp35 | Lactonase                                                          | 2.86 | 0.003577 |
| sa_c9959s8654_a_at  | SAOUHSC_02509   | rplB  | 50S ribosomal protein L2                                           | 2.85 | 0.023338 |
| sa_i6279u_x_at      | SAOUHSC_00358.1 |       | Putative uncharacterized protein                                   | 2.84 | 0.030237 |
| sa_c8481s7443_a_at  | SAOUHSC_00830   |       | Putative uncharacterized protein                                   | 2.83 | 0.025779 |
| sa_c10078s8796_a_at | SAOUHSC_01739   | lytH  | Probable cell wall amidase                                         | 2.82 | 0.003363 |
| sa_c2214s1915_at    | SAOUHSC_01490   |       | DNA-binding protein HU, putative                                   | 2.81 | 0.011536 |
| sa_c4848s4156_at    | SAOUHSC_02500   | rplE  | 50S ribosomal protein L5                                           | 2.8  | 0.028964 |
| sa_c4832s4138_at    | SAOUHSC_02494   | rpsE  | 30S ribosomal protein S5                                           | 2.77 | 0.023489 |
| sa_c10288s8968_a_at | SAOUHSC_00775   |       | Putative uncharacterized protein                                   | 2.76 | 0.009737 |
| sa_i2428ur_x_at     | SAOUHSC_01736   |       | Putative uncharacterized protein                                   | 2.76 | 0.029721 |
| sa_c1810s1538_a_at  | SAOUHSC_01364   | tyrA  | Prephenate dehydrogenase                                           | 2.72 | 0.003025 |
| sa_c8633s7584_a_at  | SAOUHSC_00880   |       | Putative uncharacterized protein                                   | 2.72 | 0.042562 |
| sa_c2564s2141_a_at  | SAOUHSC_01632   | gcvPB | Glycine decarboxylase subunit 2                                    | 2.71 | 0.00523  |
| sa_c3774s3246_a_at  | SAOUHSC_02110   |       | Putative uncharacterized protein                                   | 2.71 | 0.000384 |
| sa_c3992s9884_a_at  | SA1766          |       | Uncharacterized protein                                            | 2.7  | 0.044601 |
| sa_c8768s7712_at    | SACOL1136       |       | Uncharacterized protein                                            | 2.69 | 0.00416  |
| sa_c1449s1223_a_at  | SAOUHSC_01264   |       | Putative uncharacterized protein                                   | 2.68 | 0.008205 |
| sa_c2875s2441_a_at  | SAOUHSC_01741   | dtd   | D-aminoacyl-tRNA deacylase                                         | 2.66 | 0.004239 |
| sa_c525s350_at      | SAOUHSC_00975   |       | Putative uncharacterized protein                                   | 2.65 | 0.017037 |
| sa_c925s720_a_at    | SAOUHSC_01089   | isdG  | Heme oxygenase (staphylobilin-producing) 1                         | 2.59 | 0.001291 |
| sa_i3869u2_x_at     | SAOUHSC_02385   |       | Mannose-6-phosphate isomerase, class I                             | 2.57 | 0.042354 |
| sa_c10171s8867_at   | SAOUHSC_02384   |       | Putative uncharacterized protein                                   | 2.56 | 0.014691 |
| sa_c2572s2149_a_at  | SAOUHSC_01634   | gcvT  | Aminomethyltransferase                                             | 2.56 | 0.021299 |
| sa_c5592s4849_a_at  | SAOUHSC_02686   |       | Putative uncharacterized protein                                   | 2.56 | 0.002676 |
| sa_i10628dr_x_at    | SAOUHSC_02521   |       | Putative uncharacterized protein                                   | 2.55 | 0.048991 |
| sa_c6673s5826_a_at  | SAOUHSC_03001   | icaR  | Biofilm operon icaADBC HTH-type negative transcriptional regulator | 2.54 | 0.002358 |

|                      |               |      |                                                  |      |          |
|----------------------|---------------|------|--------------------------------------------------|------|----------|
| sa_c1132s914_a_at    | SAOUHSC_01160 |      | Putative uncharacterized protein                 | 2.52 | 0.003649 |
| sa_c1230s1008_at     | SAOUHSC_00074 |      | Periplasmic binding protein, putative            | 2.52 | 0.031299 |
| sa_c10498s10949_s_at | SAOUHSC_02555 |      | Putative uncharacterized protein                 | 2.5  | 0.006523 |
| sa_c9611s8371_a_at   | SAOUHSC_01237 |      | Isoprenyl transferase                            | 2.49 | 0.001046 |
| sa_c5885s5122_a_at   | SAOUHSC_02777 |      | Putative uncharacterized protein                 | 2.46 | 0.015485 |
| sa_c8117s7099_a_at   | SAOUHSC_00691 | uppP | Undecaprenyl-diphosphatase                       | 2.46 | 0.030884 |
| sa_c8497s7459_a_at   | SAOUHSC_00834 |      | Thioredoxin, putative                            | 2.45 | 0.003189 |
| sa_c2392s9756_a_at   | SAOUHSC_01570 |      | PVL orf 37-like protein                          | 2.44 | 0.040032 |
| sa_c3639s3120_a_at   | SAOUHSC_01984 |      | Putative uncharacterized protein                 | 2.44 | 0.003728 |
| sa_c7236s6302_a_at   | SAOUHSC_00367 |      | Putative uncharacterized protein                 | 2.43 | 0.018963 |
| sa_c5696s9156_a_at   | SAOUHSC_02716 | bioD | ATP-dependent dethiobiotin synthetase            | 2.42 | 0.000288 |
| sa_c9309s8152_at     | SAOUHSC_02596 |      | Putative uncharacterized protein                 | 2.42 | 0.00386  |
| sa_c9927s10470_a_at  | SAOUHSC_02249 |      | Putative uncharacterized protein                 | 2.41 | 0.002343 |
| sa_c5823s5065_a_at   | SAOUHSC_02761 |      | Putative uncharacterized protein                 | 2.38 | 0.007958 |
| sa_c10576s9058_a_at  | SAOUHSC_01038 | def  | Peptide deformylase                              | 2.37 | 0.001112 |
| sa_c546s374_a_at     | SAOUHSC_00980 | menA | 1,4-dihydroxy-2-naphthoate octaprenyltransferase | 2.37 | 0.004814 |
| sa_c4892s4201_a_at   | SAOUHSC_02515 |      | Putative uncharacterized protein                 | 2.34 | 0.000013 |
| sa_c5299s4579_a_at   | SAOUHSC_02638 |      | Putative uncharacterized protein                 | 2.34 | 0.003819 |
| sa_c6967s6091_a_at   | SAOUHSC_00297 |      | Putative uncharacterized protein                 | 2.33 | 0.000066 |
| sa_c1785s1516_a_at   | SAOUHSC_01357 |      | Putative uncharacterized protein                 | 2.32 | 0.001431 |
| sa_c3696s3175_a_at   | SACOL1928     |      | Uncharacterized protein                          | 2.32 | 0.000263 |
| sa_c6029s5227_a_at   | SAOUHSC_00431 |      | Putative uncharacterized protein                 | 2.32 | 0.014187 |
| sa_c791s594_at       | SAOUHSC_01045 |      | Putative uncharacterized protein                 | 2.32 | 0.005673 |
| sa_c8147s7131_a_at   | SACOL0752     |      | Uncharacterized protein                          | 2.32 | 0.019977 |
| sa_c8176s7154_a_at   | SAOUHSC_00710 |      | N-acetylglucosamine-6-phosphate deacetylase      | 2.32 | 0.011343 |
| sa_c4985s4289_a_at   | SAOUHSC_00200 |      | Membrane protein, putative                       | 2.31 | 0.000804 |
| sa_c10520s10969_at   | SAOUHSC_02818 |      | Putative uncharacterized protein                 | 2.3  | 0.044237 |
| sa_c4365s3717_a_at   | SAOUHSC_02327 | yidC | Membrane protein insertase YidC                  | 2.3  | 0.016943 |
| sa_c4530s3875_a_at   | SAOUHSC_02388 |      | Putative uncharacterized protein                 | 2.3  | 0.002931 |
| sa_c9750s10427_at    | SAOUHSC_01131 |      | Putative uncharacterized protein                 | 2.3  | 0.004642 |

|                              |               |       |                                                  |      |          |
|------------------------------|---------------|-------|--------------------------------------------------|------|----------|
| AFFX-TransRecMur/X57349_3_at |               | Tfrc  | Transferrin receptor protein 1                   | 2.29 | 0.031904 |
| sa_c8053s7040_a_at           | SAOUHSC_00673 |       | Putative uncharacterized protein                 | 2.29 | 0.001541 |
| sa_c8734s7676_a_at           | SAOUHSC_01788 | thrS  | Threonine--tRNA ligase                           | 2.28 | 0.002931 |
| sa_c10246s10660_at           | SAOUHSC_02927 | mqo   | Probable malate:quinone oxidoreductase           | 2.27 | 0.026274 |
| sa_c7841s6831_a_at           | SAOUHSC_00603 |       | Putative uncharacterized protein                 | 2.27 | 0.004131 |
| sa_i9235d2_x_at              | SAOUHSC_02411 |       | Putative uncharacterized protein                 | 2.27 | 0.036463 |
| sa_c1536s1314_a_at           | SAOUHSC_01287 |       | Glutamine synthetase                             | 2.25 | 0.046298 |
| sa_c933s729_a_at             | SAOUHSC_01093 | pheT  | Phenylalanine--tRNA ligase beta subunit          | 2.25 | 0.001065 |
| sa_c4792s4098_at             | SAOUHSC_02484 | rplQ  | 50S ribosomal protein L17                        | 2.24 | 0.003423 |
| sa_c10203s8884_a_at          | SAOUHSC_02592 |       | Putative uncharacterized protein                 | 2.23 | 0.002042 |
| sa_c4651s3971cs_s_at         | SAOUHSC_02433 |       | Putative uncharacterized protein                 | 2.23 | 0.001226 |
| sa_c6391s5562_a_at           | SAOUHSC_02926 | fda   | Fructose-bisphosphate aldolase class 1           | 2.23 | 0.041996 |
| sa_i285u_x_at                | SAOUHSC_00952 | ltaA  | Probable glycolipid permease                     | 2.23 | 0.038463 |
| sa_c7681s6690_a_at           | SAOUHSC_00540 |       | Putative uncharacterized protein                 | 2.21 | 0.023029 |
| sa_c4482s3827_a_at           | SAOUHSC_02368 | pyrG  | CTP synthase                                     | 2.2  | 0.041235 |
| sa_c5606s4859_a_at           | SAOUHSC_02689 |       | Putative uncharacterized protein                 | 2.2  | 0.005181 |
| sa_c3615s3095_a_at           | SAOUHSC_01977 |       | UPF0342 protein                                  | 2.19 | 0.006068 |
| sa_c5349s4625_a_at           | SAOUHSC_01046 | potA  | Spermidine/putrescine import ATP-binding protein | 2.19 | 0.018177 |
| sa_c8103s7087_a_at           | SAOUHSC_00687 |       | Putative uncharacterized protein                 | 2.19 | 0.000487 |
| sa_c8772s7713_a_at           | SAOUHSC_01075 | coaD  | Phosphopantetheine adenylyltransferase           | 2.19 | 0.00152  |
| sa_c8842s7778_a_at           | SAOUHSC_00539 |       | Putative uncharacterized protein                 | 2.19 | 0.003585 |
|                              |               |       | Probable glycine dehydrogenase (decarboxylating) |      |          |
| sa_c2570s2145_a_at           | SAOUHSC_01633 | gcvPA | subunit 1                                        | 2.18 | 0.001726 |
| sa_c5439s4708_a_at           | SAOUHSC_00693 |       | Putative uncharacterized protein                 | 2.18 | 0.019301 |
| sa_c5274s4572_a_at           | SAOUHSC_02630 |       | Putative uncharacterized protein                 | 2.17 | 0.0378   |
| sa_c342s182_a_at             | SAOUHSC_02629 |       | Drug resistance transporter                      | 2.16 | 0.019573 |
| sa_c5507s10021cs_s_at        | SAOUHSC_02663 |       | Putative uncharacterized protein                 | 2.16 | 0.004085 |
| sa_c6877s10101_at            | SA0553        |       | Uncharacterized protein                          | 2.16 | 0.038924 |
| sa_c8005s6991_at             | SAOUHSC_00658 |       | Putative uncharacterized protein                 | 2.16 | 0.018615 |
| sa_c1643s1381_at             | SAOUHSC_01316 |       | Putative uncharacterized protein                 | 2.15 | 0.022016 |

|                         |               |      |                                                      |      |          |
|-------------------------|---------------|------|------------------------------------------------------|------|----------|
| sa_c4828s4134_x_at      | SAOUHSC_02493 | rpmD | 50S ribosomal protein L30                            | 2.15 | 0.014046 |
| sa_c8552s7512_a_at      | SAOUHSC_00855 |      | Probable nitronate monooxygenase                     | 2.15 | 0.008901 |
| sa_c3028s2585_at        | SAOUHSC_01784 | rpIT | 50S ribosomal protein L20                            | 2.14 | 0.020854 |
| sa_c10215s10637_s_at    | SAOUHSC_02729 |      | Amino acid ABC transporter-like protein, putative    | 2.13 | 0.003487 |
| sa_c1478s1255_a_at      | SAOUHSC_01272 | mutS | DNA mismatch repair protein                          | 2.13 | 0.002966 |
| sa_c1974s1697_a_at      | SAOUHSC_01411 |      | Putative branched-chain amino acid carrier protein   | 2.13 | 0.004378 |
| sa_c4498s3842_a_at      | SAOUHSC_02376 |      | Putative uncharacterized protein                     | 2.13 | 0.035334 |
|                         |               |      | NADPH-dependent 7-cyano-7-deazaguanine reductase     | 2.13 | 0.018593 |
| sa_c8256s7233_at        | SAOUHSC_00739 | queF | Putative uncharacterized protein                     | 2.13 | 0.021208 |
| sa_i1041u_x_at          | SAOUHSC_01200 |      | Protein SprT-like                                    | 2.13 | 0.034443 |
| sa_i3597ur_x_at         | SAOUHSC_02296 |      | Conserved hypothetical phage protein                 | 2.11 | 0.00755  |
| sa_c1579s9626_a_at      | SAOUHSC_02016 |      | 50S ribosomal protein L27                            | 2.11 | 0.003632 |
| sa_c2922s2484_a_at      | SAOUHSC_01755 | rpmA | Putative uncharacterized protein                     | 2.11 | 0.021766 |
| sa_c3361s2898_a_at      | SAOUHSC_01878 |      | 6-carboxyhexanoate--CoA ligase                       | 2.11 | 0.030272 |
| sa_c5676s4926_a_at      | SAOUHSC_02712 | bioW | Putative uncharacterized protein                     | 2.11 | 0.000937 |
| sa_c9334s8169_a_at      | SAOUHSC_02668 |      | Putative uncharacterized protein                     | 2.1  | 0.024465 |
| sa_c10366s10758cv_s_a_t | SAOUHSC_01732 |      | Putative uncharacterized protein                     | 2.1  | 0.049511 |
| sa_c8502s10249cs_s_at   | SAOUHSC_00838 |      | Putative uncharacterized protein                     | 2.09 | 0.025396 |
| sa_c1620s1365_a_at      | SAOUHSC_01309 |      | Putative uncharacterized protein                     | 2.09 | 0.040311 |
| sa_c5680s4930_a_at      | SAOUHSC_02713 |      | Peptide ABC transporter, permease protein, putative  | 2.08 | 0.020658 |
| sa_c4034s3428_a_at      | SAOUHSC_00169 |      | Putative uncharacterized protein                     | 2.07 | 0.002649 |
| sa_c1425s1202_a_at      | SAOUHSC_01255 |      | GAF domain protein                                   | 2.07 | 0.016942 |
| sa_c3186s2733_a_at      | SAOUHSC_01828 |      | Putative uncharacterized protein                     | 2.07 | 0.039699 |
| sa_c6333s5501_a_at      | SAOUHSC_02910 |      | Probable DNA-directed RNA polymerase subunit delta   | 2.06 | 0.012086 |
| sa_c9811s8552_a_at      | SAOUHSC_02369 | rpoE | Putative uncharacterized protein                     | 2.04 | 0.027575 |
| sa_c1494s1273_at        | SAOUHSC_01275 |      | Restriction modification system specificity subunit, | 2.04 | 0.04971  |
| sa_c3507s3024_a_at      | SAOUHSC_00398 |      |                                                      |      |          |

|                    |                 |                 |                                                            |       |          |
|--------------------|-----------------|-----------------|------------------------------------------------------------|-------|----------|
|                    |                 |                 | putative                                                   |       |          |
| sa_c4239s3588_a_at | SAOUHSC_02288   | leuD            | 3-isopropylmalate dehydratase small subunit                | 2.04  | 0.03028  |
| sa_c9882s8618_a_at | SAOUHSC_02125   |                 | Putative uncharacterized protein                           | 2.04  | 0.017615 |
| sa_c2487s2066_a_at | SACOL1557       |                 | Uncharacterized protein                                    | 2.03  | 0.006422 |
| sa_c7851s6843_a_at | SAOUHSC_00607   |                 | Putative uncharacterized protein                           | 2.03  | 0.022458 |
| sa_c9653s8413_a_at | SAOUHSC_01666   | glyQS           | Glycine--tRNA ligase                                       | 2.03  | 0.014401 |
| sa_c10061s8767_at  | SAOUHSC_01406   | acyP            | Acylphosphatase                                            | 2.02  | 0.001378 |
| sa_c5081s4376_a_at | SAOUHSC_02575   |                 | Putative uncharacterized protein                           | 2.02  | 0.011947 |
| sa_c6044s5243_a_at | SAOUHSC_02824   |                 | Putative uncharacterized protein                           | 2.02  | 0.018407 |
| sa_c1739s1473_a_at | SAOUHSC_01344   |                 | Putative uncharacterized protein                           | 2.01  | 0.013253 |
| sa_c9141s8010_at   | SAOUHSC_01971   |                 | Putative uncharacterized protein                           | 2.01  | 0.027184 |
| sa_i4391u_x_at     | SAOUHSC_02580.1 |                 | Putative uncharacterized protein                           | 2.01  | 0.00136  |
| sa_c5788s5026_a_at | SAOUHSC_02747   |                 | Putative uncharacterized protein                           | -2.01 | 0.016371 |
| sa_i2813d_x_at     | SAOUHSC_01854   |                 | Putative uncharacterized protein                           | -2.01 | 0.035666 |
| sa_c3728s3205_a_at | SAOUHSC_02097   |                 | Putative uncharacterized protein                           | -2.02 | 0.000237 |
| sa_c1994s9145_a_at | SAOUHSC_01418   | odhA            | 2-oxoglutarate dehydrogenase E1 component                  | -2.03 | 0.001392 |
| sa_c3399s2929_a_at | SAOUHSC_01890   |                 | Putative uncharacterized protein                           | -2.03 | 0.017817 |
| sa_c3850s3320_a_at | SAOUHSC_00158   |                 | PTS system EIIBC component                                 | -2.03 | 0.007899 |
| sa_c9989s8682_a_at | SAOUHSC_01172   | pyrE            | Orotate phosphoribosyltransferase                          | -2.03 | 0.031617 |
| sa_i10245u_x_at    | SACOL0865       |                 | Uncharacterized protein                                    | -2.03 | 0.001526 |
| sa_c7199s6265_a_at | SAOUHSC_00356   |                 | Putative uncharacterized protein                           | -2.04 | 0.025984 |
| sa_c3422s2952_a_at | SAOUHSC_01900   |                 | Putative uncharacterized protein                           | -2.05 | 0.005939 |
| sa_c7931s6914_a_at | SAOUHSC_00628   | mnhD2;<br>mrpD2 | Putative antiporter subunit                                | -2.05 | 0.017194 |
|                    |                 |                 | Succinate dehydrogenase cytochrome b-558 subunit, putative | -2.05 | 0.002805 |
| sa_c965s755_at     | SAOUHSC_01103   |                 | UPF0478 protein                                            | -2.06 | 0.00502  |
| sa_c3270s2813_at   | SAOUHSC_01855   |                 | Putative uncharacterized protein                           | -2.06 | 0.018394 |
| sa_i4014ur_x_at    | SAOUHSC_00189   |                 | Putative uncharacterized protein                           | -2.07 | 0.042416 |
| sa_c1458s1237_a_at | SAOUHSC_01267   |                 | Uncharacterized protein                                    | -2.07 | 0.016634 |
| sa_c1825s9344_a_at | SAOUHSC_00094   |                 |                                                            |       |          |

|                        |               |      |                                              |       |          |
|------------------------|---------------|------|----------------------------------------------|-------|----------|
| sa_c5560s4814_a_at     | SAOUHSC_02678 |      | Respiratory nitrate reductase, gamma subunit | -2.07 | 0.006821 |
| sa_c570s397_a_at       | SAOUHSC_00988 | sspA | Glutamyl endopeptidase                       | -2.07 | 0.01769  |
| sa_c8990s7897_at       | SAOUHSC_00799 | eno  | Enolase                                      | -2.07 | 0.007158 |
| sa_c5516s4772_a_at     | SAOUHSC_02665 |      | Putative uncharacterized protein             | -2.08 | 0.023831 |
| sa_c8043s7027_a_at     | SAOUHSC_00668 |      | ABC transporter permease, putative           | -2.08 | 0.000887 |
| sa_c904s700_a_at       | SAOUHSC_00060 |      | Putative uncharacterized protein             | -2.08 | 0.003651 |
| sa_c9253s8099_a_at     | SAOUHSC_00227 |      | Putative uncharacterized protein             | -2.08 | 0.01711  |
| sa_c10218s8900_a_at    | SAOUHSC_02757 |      | Antitoxin                                    | -2.09 | 0.007769 |
| sa_c10293s8975_at      | SAOUHSC_00807 |      | Putative uncharacterized protein             | -2.1  | 0.014604 |
| sa_c6299s5473_a_at     | SAOUHSC_02900 |      | Uncharacterized hydrolase                    | -2.1  | 0.009114 |
| sa_c3643s3123_a_at     | SAOUHSC_01987 |      | Putative uncharacterized protein             | -2.12 | 0.001848 |
| sa_c7633s6648_a_at     | SAOUHSC_00524 | rpoB | DNA-directed RNA polymerase subunit beta     | -2.12 | 0.000143 |
| sa_c1045s829_a_at      | SAOUHSC_01127 |      | Putative uncharacterized protein             | -2.13 | 0.029903 |
| sa_c2417s9774cv_s_at   | SAOUHSC_01583 |      | Conserved hypothetical phage protein         | -2.13 | 0.038051 |
| sa_c8424s7394_a_at     | SAOUHSC_00808 |      | Putative uncharacterized protein             | -2.13 | 0.021525 |
| sa_c7883s6875_a_at     | SAOUHSC_00616 |      | Putative uncharacterized protein             | -2.14 | 0.023138 |
| sa_c1s2_a_at           | SAOUHSC_00001 | dnaA | Chromosomal replication initiator protein    | -2.15 | 0.002101 |
| sa_c10627s11083cv_s_at | SAOUHSC_00875 |      | Putative uncharacterized protein             | -2.16 | 0.017605 |
| sa_c7431s6453_a_at     | SAOUHSC_00441 |      | Putative uncharacterized protein             | -2.16 | 0.004797 |
| sa_c7637s6652_a_at     | SAOUHSC_00525 | rpoC | DNA-directed RNA polymerase subunit beta     | -2.16 | 0.003953 |
| sa_c8934s7849_a_at     | SAOUHSC_00716 |      | Putative uncharacterized protein             | -2.17 | 0.00507  |
| sa_c10526s10981_a_at   | SAOUHSC_02857 |      | Putative uncharacterized protein             | -2.19 | 0.044782 |
| sa_c10546s11006_s_at   | SAOUHSC_00776 |      | Excinuclease ABC, B subunit                  | -2.19 | 0.006897 |
| sa_c6341s5509_a_at     | SAOUHSC_00234 |      | Putative uncharacterized protein             | -2.19 | 0.009987 |
| sa_c4755s4067_a_at     | SAOUHSC_02466 |      | Truncated MHC class II analog protein        | -2.2  | 0.007057 |
| sa_c10365s10757cv_s_at | SAOUHSC_01725 | mmmA | tRNA-specific 2-thiouridylase                | -2.21 | 0.014906 |
| sa_c1457s1233_a_at     | SAOUHSC_01266 |      | Putative uncharacterized protein             | -2.21 | 0.000987 |
| sa_c6411s5581_a_at     | SAOUHSC_00236 |      | 6-phospho-beta-glucosidase, putative         | -2.21 | 0.002044 |

|                       |               |      |                                                              |       |          |
|-----------------------|---------------|------|--------------------------------------------------------------|-------|----------|
| sa_c7224s6289_a_at    | SAOUHSC_00364 | ahpF | Alkyl hydroperoxide reductase subunit F                      | -2.22 | 0.043294 |
| sa_c10684s11134cv_s_a | SAOUHSC_00183 |      | Membrane protein, putative                                   | -2.23 | 0.004424 |
| sa_c4971s4276_a_at    | SAOUHSC_02543 | moaC | Cyclic pyranopterin monophosphate synthase accessory protein | -2.24 | 0.006827 |
| sa_c6506s5675_a_at    | SAOUHSC_02963 | clfB | Clumping factor B                                            | -2.25 | 0.001858 |
| sa_c9495s8286_a_at    | SAOUHSC_00037 |      | Putative uncharacterized protein                             | -2.26 | 0.025397 |
| sa_c3979s9871_at      | SA1762        |      | Uncharacterized protein                                      | -2.27 | 0.006279 |
| sa_c4038s9918_s_at    | SAOUHSC_00383 |      | Putative uncharacterized protein                             | -2.27 | 0.000898 |
| sa_c2851s2417_at      | SAOUHSC_01729 |      | Putative uncharacterized protein                             | -2.29 | 0.026492 |
| sa_c9344s8176_a_at    | SAOUHSC_02724 |      | Putative uncharacterized protein                             | -2.29 | 0.00353  |
| sa_c8485s7447_a_at    | SAOUHSC_00831 |      | Organic hydroperoxide resistance protein-like                | -2.3  | 0.010937 |
| sa_c3951s9849_a_at    | SAOUHSC_02163 | hlb  | Phospholipase C                                              | -2.31 | 0.011288 |
| sa_c6086s5272_a_at    | SAOUHSC_00228 |      | Putative uncharacterized protein                             | -2.31 | 0.028357 |
| sa_c1996s1713_a_at    | SAOUHSC_01419 | arlS | Signal transduction histidine-protein kinase                 | -2.32 | 0.014091 |
| sa_c3976s9867_at      | SAOUHSC_00163 |      | Putative uncharacterized protein                             | -2.32 | 0.02062  |
| sa_c5855s5097_a_at    | SAOUHSC_02769 |      | Putative uncharacterized protein                             | -2.32 | 0.040251 |
| sa_c10217s8896_a_at   | SAOUHSC_02756 |      | Putative uncharacterized protein                             | -2.33 | 0.010118 |
| sa_c3053s2604_a_at    | SAOUHSC_01792 |      | Putative uncharacterized protein                             | -2.34 | 0.001672 |
| sa_c3870s3341_a_at    | SAOUHSC_02137 | sdcS | Sodium-dependent dicarboxylate transporter                   | -2.34 | 0.014902 |
| sa_c485s314_at        | SAOUHSC_00962 |      | Putative uncharacterized protein                             | -2.34 | 0.001246 |
| sa_c7041s6150_a_at    | SAOUHSC_00319 |      | Putative uncharacterized protein                             | -2.34 | 0.007571 |
| sa_c7422s6445_a_at    | SAOUHSC_00438 |      | Alpha amylase family protein, putative                       | -2.34 | 0.001506 |
| sa_c4917s4223_a_at    | SAOUHSC_00199 |      | Acetate CoA-transferase YdiF                                 | -2.35 | 0.010221 |
| sa_c2670s2245_a_at    | SAOUHSC_01671 |      | Diacylglycerol kinase, putative                              | -2.37 | 0.031066 |
| sa_c6021s5217_a_at    | SAOUHSC_00226 |      | Putative uncharacterized protein                             | -2.38 | 0.008936 |
| sa_c6390s5558_at      | SAOUHSC_02925 |      | Putative uncharacterized protein                             | -2.38 | 0.027686 |
| sa_c9s10_at           | SAOUHSC_00003 |      | Putative uncharacterized protein                             | -2.38 | 0.01218  |
| sa_c1078s861_at       | SAOUHSC_01142 | mraZ | Transcriptional regulator                                    | -2.4  | 0.005102 |
| sa_c3778s3248_a_at    | SAOUHSC_00156 |      | Putative uncharacterized protein                             | -2.4  | 0.011886 |

|                     |               |          |                                                      |       |          |
|---------------------|---------------|----------|------------------------------------------------------|-------|----------|
| sa_c3322s2866_a_at  | SAOUHSC_01869 |          | Putative uncharacterized protein                     | -2.41 | 0.000683 |
| sa_c3414s2943_at    | SAOUHSC_01898 |          | Putative uncharacterized protein                     | -2.41 | 0.00953  |
| sa_c6010s5210_a_at  | SAOUHSC_02812 |          | Putative uncharacterized protein                     | -2.41 | 0.000371 |
| sa_c85s79_a_at      |               | orfX     | OrfX (Fragment)                                      | -2.41 | 0.013493 |
| sa_c7311s10178_at   | SA0394        |          | Uncharacterized protein                              | -2.43 | 0.040007 |
| sa_c6579s5745_a_at  | SAOUHSC_02983 | gtf2     | Glycosyltransferase stabilizing protein              | -2.44 | 0.008217 |
| sa_c9552s10406_a_at | SA0191        |          | Uncharacterized protein                              | -2.44 | 0.040853 |
| sa_c592s9345_a_at   | SAOUHSC_00994 | atl; nag | Bifunctional autolysin                               | -2.46 | 0.003138 |
| sa_c9528s8308_a_at  | SAOUHSC_00086 |          | 3-ketoacyl-acyl carrier protein reductase, putative  | -2.46 | 0.004247 |
| sa_c1088s869_a_at   | SAOUHSC_01144 | ftsL     | Cell division protein FtsL                           | -2.47 | 0.022438 |
| sa_c2556s2131_at    | SAOUHSC_01629 | lipM     | Octanoyltransferase                                  | -2.47 | 0.008971 |
| sa_c6062s5256_a_at  | SAOUHSC_02829 |          | Putative NAD(P)H nitroreductase                      | -2.47 | 0.002067 |
| sa_i10262dr_x_at    | SA1636        |          | Uncharacterized protein                              | -2.47 | 0.036775 |
| sa_c3448s2976_a_at  | SAOUHSC_01910 | pckA     | Phosphoenolpyruvate carboxykinase                    | -2.48 | 0.002938 |
| sa_c6539s5707_a_at  | SAOUHSC_02971 |          | Aureolysin, putative                                 | -2.48 | 0.00659  |
| sa_c5500s4763_a_at  | SAOUHSC_02660 |          | Putative uncharacterized protein                     | -2.49 | 0.002343 |
| sa_c5496s4759_a_at  | SAOUHSC_02659 |          | Putative uncharacterized protein                     | -2.5  | 0.003641 |
| sa_c5504s9245_a_at  | SAOUHSC_02661 |          | PTS system sucrose-specific IIBC component, putative | -2.5  | 0.011424 |
| sa_c5544s4800_a_at  | SAOUHSC_02675 | nreC     | Oxygen regulatory protein                            | -2.5  | 0.016078 |
| sa_c5187s4486_a_at  | SAOUHSC_02608 |          | Putative uncharacterized protein                     | -2.51 | 0.002604 |
| sa_c5548s4804_a_at  | SAOUHSC_02676 | nreB     | Oxygen sensor histidine kinase                       | -2.52 | 0.009468 |
| sa_c7665s6679_a_at  | SAOUHSC_00535 |          | Uncharacterized epimerase/dehydratase                | -2.52 | 0.007247 |
| sa_c6381s5549_a_at  | SAOUHSC_00235 |          | Putative uncharacterized protein                     | -2.53 | 0.008763 |
| sa_c2501s2080_a_at  | SAOUHSC_01613 |          | 2-oxoisovalerate dehydrogenase                       | -2.54 | 0.006327 |
| sa_c439s269_a_at    | SAOUHSC_00950 |          | Putative uncharacterized protein                     | -2.54 | 0.009069 |
| sa_c6547s5715_a_at  | SAOUHSC_02973 |          | Putative uncharacterized protein                     | -2.54 | 0.000161 |
| sa_c700s509_a_at    | SAOUHSC_01019 |          | Putative uncharacterized protein                     | -2.54 | 0.000067 |
| sa_c7698s6703_a_at  | SAOUHSC_00544 | sdrC     | Serine-aspartate repeat-containing protein C         | -2.55 | 0.001277 |
| sa_i10200u_x_at     | SAOUHSC_00537 |          | Putative uncharacterized protein                     | -2.55 | 0.035087 |



|                     |               |      |                                                |       |          |
|---------------------|---------------|------|------------------------------------------------|-------|----------|
| sa_c4134s3487_a_at  | SAOUHSC_02257 |      | Putative uncharacterized protein               | -2.56 | 0.002111 |
| sa_c6758s5899_a_at  | SAOUHSC_03022 |      | UPF0312 protein                                | -2.56 | 0.001865 |
| sa_c2678s2252_a_at  | SAOUHSC_01673 |      | Putative uncharacterized protein               | -2.57 | 0.026329 |
| sa_c7965s6952_a_at  | SAOUHSC_00643 |      | TagB protein, putative                         | -2.6  | 0.018204 |
| sa_c10333s9011_a_at | SAOUHSC_01244 |      | Putative uncharacterized protein               | -2.61 | 0.02838  |
| sa_c2707s2281_a_at  | SAOUHSC_01685 | hrcA | Heat-inducible transcription repressor         | -2.61 | 0.012155 |
| sa_c9589s8350_a_at  | SAOUHSC_01262 | recA | Recombinase A                                  | -2.61 | 0.000065 |
| sa_c5195s4497_a_at  | SAOUHSC_02610 | hutG | Formimidoylglutamase                           | -2.62 | 0.005135 |
| sa_c6732s5872_a_at  | SAOUHSC_03016 |      | Putative uncharacterized protein               | -2.62 | 0.001983 |
| sa_c9676s8432_a_at  | SAOUHSC_01646 |      | Glucokinase, putative                          | -2.62 | 0.004297 |
| sa_c4589s3921_a_at  | SAOUHSC_02404 |      | Putative uncharacterized protein               | -2.63 | 0.000398 |
| sa_c7710s6710_a_at  | SAOUHSC_00548 |      | Putative uncharacterized protein               | -2.63 | 0.002925 |
| sa_c6173s5353_a_at  | SAOUHSC_02862 | clpL | ATP-dependent Clp protease ATP-binding subunit | -2.64 | 0.010622 |
| sa_c2509s2087_a_at  | SAOUHSC_01615 |      | DNA repair protein RecN                        | -2.66 | 0.002243 |
| sa_c7036s9080_a_at  | SAOUHSC_00318 |      | Putative uncharacterized protein               | -2.67 | 0.014088 |
| sa_c5614s4868_a_at  | SAOUHSC_02691 |      | Putative uncharacterized protein               | -2.68 | 0.001658 |
| sa_c2666s2241_a_at  | SACOL1625     | cdd  | Cytidine deaminase                             | -2.7  | 0.003532 |
| sa_c7389s6417_a_at  | SAOUHSC_00429 |      | MutT/nudix family protein, putative            | -2.73 | 0.006965 |
| sa_c9652s8408_a_at  | SAOUHSC_01668 | era  | GTPase                                         | -2.74 | 0.002453 |
|                     |               |      | Molybdenum ABC transporter, periplasmic        |       |          |
| sa_i10003u2r_x_at   | SAOUHSC_02549 |      | molybdate-binding protein                      | -2.75 | 0.042267 |
| sa_i8754ur_x_at     | SAOUHSC_01363 |      | Putative uncharacterized protein               | -2.75 | 0.000177 |
| sa_c2258s1957_a_at  | SAOUHSC_00107 |      | Putative uncharacterized protein               | -2.76 | 0.002964 |
| sa_c704s512_a_at    | SAOUHSC_01021 |      | Putative uncharacterized protein               | -2.77 | 0.032379 |
| sa_c9499s10392_a_at | SAOUHSC_00043 |      | Putative uncharacterized protein               | -2.77 | 0.00116  |
| sa_c7287s6347_a_at  | SAOUHSC_00386 |      | Putative uncharacterized protein               | -2.78 | 0.001697 |
| sa_c2497s2076_a_at  | SAOUHSC_01612 |      | 2-oxoisovalerate dehydrogenase                 | -2.8  | 0.004768 |
| sa_c4675s3995_a_at  | SAOUHSC_02443 |      | Putative uncharacterized protein               | -2.8  | 0.006852 |
| sa_c5435s4704_a_at  | SAOUHSC_00647 |      | Putative uncharacterized protein               | -2.8  | 0.004972 |
| sa_c969s761_a_at    | SAOUHSC_01104 |      | Succinate dehydrogenase                        | -2.8  | 0.001273 |

|                      |               |            |                                                                                     |       |          |
|----------------------|---------------|------------|-------------------------------------------------------------------------------------|-------|----------|
| sa_c7393s6421_a_at   | SAOUHSC_00430 |            | Putative uncharacterized protein                                                    | -2.81 | 0.009095 |
| sa_c9087s10315_s_at  | SAOUHSC_01956 |            | Putative uncharacterized protein                                                    | -2.81 | 0.005649 |
| sa_i10084u_x_at      | SAOUHSC_02990 | sraP; sasA | Serine-rich adhesin for platelets ( <i>Staphylococcus aureus</i> surface protein A) | -2.84 | 0.008494 |
| sa_i2952u_x_at       | SAOUHSC_01899 |            | Putative uncharacterized protein                                                    | -2.84 | 0.003355 |
| sa_c5381s4656_a_at   | SAOUHSC_00667 |            | ABC transporter ATP-binding protein, putative                                       | -2.87 | 0.000454 |
| sa_c5616s4872_a_at   | SAOUHSC_02692 |            | Antitoxin                                                                           | -2.89 | 0.002561 |
| sa_c6938s6059_a_at   | SAOUHSC_00285 |            | Putative uncharacterized protein                                                    | -2.9  | 0.00282  |
| sa_c8190s7169_at     | SAOUHSC_00715 | saeR       | Response regulator SaeR                                                             | -2.9  | 0.003836 |
| sa_i5185ur_x_at      | SAOUHSC_02804 |            | Putative uncharacterized protein                                                    | -2.9  | 0.047565 |
| sa_c2346s1974_a_at   | SAOUHSC_00114 |            | Capsular polysaccharide biosynthesis protein, putative                              | -2.91 | 0.003213 |
| sa_c720s531_a_at     | SAOUHSC_01027 |            | Putative uncharacterized protein                                                    | -2.91 | 0.010065 |
| sa_c2658s2233_a_at   | SAOUHSC_01667 | recO       | DNA repair protein                                                                  | -2.92 | 0.021975 |
| sa_c2861s2424_a_at   | SACOL1682     |            | ATPase, AAA family                                                                  | -2.92 | 0.002734 |
| sa_c1378s1153_a_at   | SAOUHSC_01242 | rimP       | Ribosome maturation factor                                                          | -2.93 | 0.017287 |
| sa_c4581s3912_a_at   | SAOUHSC_02402 |            | PTS system, mannitol-specific IIa component, putative                               | -2.94 | 0.001827 |
| sa_c5807s5048_a_at   | SAOUHSC_02753 |            | Membrane protein, putative                                                          | -2.94 | 0.010798 |
| sa_c8111s7096_at     | SAOUHSC_00690 |            | Putative uncharacterized protein                                                    | -2.94 | 0.003933 |
| sa_c6403s5575_a_at   | SAOUHSC_02930 |            | Putative uncharacterized protein                                                    | -2.96 | 0.009801 |
| sa_c10280s8964_a_at  | SAOUHSC_00481 |            | Putative uncharacterized protein                                                    | -2.98 | 0.004134 |
| sa_c18s19_a_at       | SAOUHSC_00005 | gyrB       | DNA gyrase subunit B                                                                | -2.98 | 0.00007  |
| sa_c8196s7173_a_at   | SAOUHSC_00717 |            | Putative uncharacterized protein                                                    | -3    | 0.017332 |
| sa_c10267s9119_a_at  | SACOL1879     |            | Transposase                                                                         | -3.01 | 0.008038 |
| sa_c8308s7288_a_at   | SAOUHSC_00757 | pepT       | Peptidase T                                                                         | -3.05 | 0.014233 |
| sa_c6129s5308cs_s_at | SAOUHSC_02849 |            | Pyruvate oxidase, putative                                                          | -3.08 | 0.001299 |
| sa_c8459s7421_a_at   | SAOUHSC_00821 |            | Putative uncharacterized protein                                                    | -3.08 | 0.013888 |
| sa_c5652s4904_a_at   | SAOUHSC_02706 | sbi        | Immunoglobulin-binding protein                                                      | -3.09 | 0.001308 |
| sa_c22s9176_a_at     | SAOUHSC_00006 | gyrA       | DNA gyrase subunit A                                                                | -3.1  | 0.002266 |

|                            |               |               |                                                   |       |          |
|----------------------------|---------------|---------------|---------------------------------------------------|-------|----------|
| sa_c10607s11063_a_at       | SACOL0359     |               | Uncharacterized protein                           | -3.13 | 0.042962 |
| sa_i10436ur_x_at           | SAOUHSC_00825 |               | Putative uncharacterized protein                  | -3.18 | 0.021153 |
| sa_c8380s7355_a_at         | SAOUHSC_00792 |               | Epimerase family protein                          | -3.21 | 0.009146 |
| sa_c8473s7434_a_at         | SAOUHSC_00826 |               | Putative uncharacterized protein                  | -3.23 | 0.001067 |
| sa_c9634s8390_a_at         | SAOUHSC_01684 | grpE          | Protein GrpE (HSP-70 cofactor)                    | -3.23 | 0.00122  |
| sa_c1384s1156_a_at         | SAOUHSC_01243 | nusA          | Transcription termination/antitermination protein | -3.24 | 0.000406 |
| sa_c5556s4813_a_at         | SAOUHSC_02677 |               | Putative uncharacterized protein                  | -3.25 | 0.011151 |
| sa_c5608s4864_a_at         | SAOUHSC_02690 |               | Putative uncharacterized protein                  | -3.39 | 0.000892 |
| sa_c2505s2085_a_at         | SAOUHSC_01614 |               | Dihydrolipoyl dehydrogenase                       | -3.41 | 0.00184  |
| sa_c3949s9846_at           | SAOUHSC_02161 |               | MHC class II analog protein                       | -3.43 | 0.001884 |
| sa_c8643s7591_a_at         | SAOUHSC_00882 |               | Putative uncharacterized protein                  | -3.52 | 0.005775 |
| sa_c6058s5252_a_at         | SAOUHSC_02828 |               | Putative uncharacterized protein                  | -3.56 | 0.000789 |
| sa_c5331s10015_s_at        | SAOUHSC_01948 |               | ABC transporter domain protein                    | -3.58 | 0.005708 |
| sa_c4671s3991_at           | SAOUHSC_02442 |               | Putative uncharacterized protein                  | -3.6  | 0.006425 |
| sa_c5660s4913_a_at         | SAOUHSC_02708 |               | Gamma-hemolysin h-gamma-ii subunit, putative      | -3.63 | 0.010476 |
| sa_c9491s8284_a_at         | SAOUHSC_00036 |               | Putative uncharacterized protein                  | -3.63 | 0.000481 |
| sa_c3059s2614_a_at         | SAOUHSC_01794 |               | Glyceraldehyde-3-phosphate dehydrogenase          | -3.64 | 0.005142 |
| sa_c7418s6444_a_at         | SAOUHSC_00437 |               | Putative uncharacterized protein                  | -3.69 | 0.000299 |
| sa_c9481s10390_x_at        | SAV1827       | yent1         | Enterotoxin                                       | -3.72 | 0.019356 |
| sa_c1390s1164_a_at         | SAOUHSC_01245 |               | Putative uncharacterized protein                  | -3.8  | 0.000915 |
| sa_c298s136_a_at           | SAOUHSC_02994 |               | Putative uncharacterized protein                  | -3.83 | 0.013808 |
| sa_c5431s4700_a_at         | SAOUHSC_00842 | metN2         | Methionine import ATP-binding protein             | -3.94 | 0.000245 |
| sa_c7333s6374_a_at         | SAOUHSC_00410 |               | Putative uncharacterized protein                  | -3.95 | 0.000464 |
| sa_c5429s4696_a_at         | SAOUHSC_02754 |               | ABC transporter, ATP-binding protein, putative    | -3.99 | 0.003891 |
| sa_c1084s865_a_at          | SAOUHSC_01143 | rsmH;<br>mraW | Ribosomal RNA small subunit methyltransferase H   | -4.01 | 0.000832 |
| sa_c10510s10955cv_s_a<br>t | SAOUHSC_02662 |               | PTS system sucrose-specific IIBC component        | -4.05 | 0.001398 |
| sa_c3552s9819_at           | SA1641        |               | Uncharacterized protein                           | -4.05 | 0.044428 |
| sa_c8681s7630_a_at         | SAOUHSC_00898 | argH          | Argininosuccinate lyase                           | -4.16 | 0.03496  |

|                      |                 |       |                                         |       |          |
|----------------------|-----------------|-------|-----------------------------------------|-------|----------|
| sa_c13s15_a_at       | SAOUHSC_00004   | recF  | DNA replication and repair protein      | -4.2  | 0.001342 |
| sa_c4528s3873_a_at   | SAOUHSC_02387   |       | Putative uncharacterized protein        | -4.29 | 0.032074 |
| sa_c8512s7471_a_at   | SAOUHSC_00843   |       | Putative uncharacterized protein        | -4.3  | 0.001908 |
| sa_c4097s3454_a_at   | SAOUHSC_00173   | azoR  | FMN-dependent NADH-azoreductase         | -4.35 | 0.000758 |
| sa_c6531s5696_a_at   | SAOUHSC_02969   | arcA  | Arginine deiminase                      | -4.38 | 0.016651 |
| sa_c5925s10044_a_at  | SAOUHSC_00054   |       | Uncharacterized lipoprotein             | -4.41 | 0.023536 |
| sa_c5668s4921_a_at   | SAOUHSC_02710   | hlgB  | Gamma-hemolysin component B             | -4.52 | 0.009031 |
| sa_i4366d_x_at       | SAOUHSC_02572   |       | Putative uncharacterized protein        | -4.55 | 0.030581 |
| sa_c8250s7228_a_at   | SAOUHSC_00736   |       | Putative lipid kinase                   | -4.63 | 0.004732 |
| sa_c9902s10445_a_at  | SAOUHSC_02188   |       | Phage head-tail adaptor, putative       | -4.7  | 0.033738 |
| sa_c6131s5312_a_at   | SAOUHSC_02850   | cidB  | Holin-like protein                      | -5.03 | 0.001963 |
| sa_c130s9468_a_at    | SA0042          |       | Uncharacterized protein                 | -5.14 | 0.018479 |
| sa_c7499s6519_a_at   | SAOUHSC_00468   |       | Putative uncharacterized protein        | -5.28 | 0.000749 |
| sa_c47s43_a_at       | SAOUHSC_00013   |       | Homoserine O-acetyltransferase          | -5.47 | 0.003433 |
| sa_i11103dr_x_at     | SA1208          |       | Uncharacterized protein                 | -5.48 | 0.017694 |
| sa_i4668dr_x_at      | SAOUHSC_02002   |       | Putative uncharacterized protein        | -5.63 | 0.030129 |
| sa_i10401ur_x_at     | SAOUHSC_00083.1 |       | Putative uncharacterized protein        | -5.83 | 0.045376 |
|                      | SAOUHSC_00050   |       |                                         |       |          |
| sa_c8799s7739_a_at   | 0               | pdxT  | Pyridoxal 5'-phosphate synthase subunit | -5.95 | 0.000092 |
|                      | SAOUHSC_0244    |       |                                         |       |          |
| sa_c4667s3987_a_at   | 1               | asp23 | Alkaline shock protein 23               | -6.12 | 0.000397 |
|                      | SAOUHSC_0270    |       |                                         |       |          |
| sa_c5664s4917_a_at   | 9               | hlgC  | Gamma-hemolysin component C             | -6.61 | 0.002693 |
| sa_c7895s6886_a_at   | SAOUHSC_00619   |       | Putative uncharacterized protein        | -6.86 | 0.002221 |
| sa_i9869dr_x_at      | SAOUHSC_02176   |       | Conserved hypothetical phage protein    | -6.88 | 0.022378 |
| sa_c10407s10824_a_at | SAOUHSC_02046   |       | Conserved hypothetical phage protein    | -7.33 | 0.008613 |
| sa_c8434s7406_a_at   | SAOUHSC_00812   | clfA  | Clumping factor A                       | -8.03 | 0.00118  |
| sa_c8685s7634_a_at   | SAOUHSC_00899   | argG  | Argininosuccinate synthase              | -8.44 | 0.031617 |
| sa_c8807s7748_a_at   | SAOUHSC_00502   | ctsR  | Transcriptional regulator               | -8.61 | 0.014452 |
| sa_c7428s10194_at    | SAOUHSC_00440   |       | Putative uncharacterized protein        | -8.86 | 0.032641 |

|                     |               |             |                                                |        |          |
|---------------------|---------------|-------------|------------------------------------------------|--------|----------|
| sa_c256s9573_s_at   | SAOUHSC_00505 | clpC        | ATP-dependent Clp protease ATP-binding subunit | -9.02  | 0.001908 |
| sa_c8795s7735_a_at  | SAOUHSC_00499 | pdxS        | Pyridoxal 5'-phosphate synthase subunit        | -9.09  | 0.000204 |
| sa_c4369s3721_at    | SAOUHSC_02328 | thiE        | Thiamine-phosphate synthase                    | -9.11  | 0.016013 |
| sa_c278s123_a_at    | SAOUHSC_00912 | clpB        | Chaperone protein                              | -9.54  | 0.00207  |
| sa_c8813s7749_a_at  | SAOUHSC_00504 | mcsB        | Protein-arginine kinase                        | -11.49 | 0.003188 |
| sa_c7571s6589_a_at  | SAOUHSC_00503 | mcsA        | Protein-arginine kinase activator protein      | -11.77 | 0.005313 |
| sa_c7784s10209_a_at | SA2012        |             | Uncharacterized protein                        | -12.26 | 0.008462 |
| sa_c6244s5421_a_at  | SAOUHSC_02881 | crtP; crtNb | Diapolycopene oxygenase                        | -13.08 | 0.014419 |
| sa_i10696u_x_at     | SAOUHSC_00974 |             | Glycosyl transferase, group 1                  | -25.4  | 0.043503 |

---

**Figure S5.**

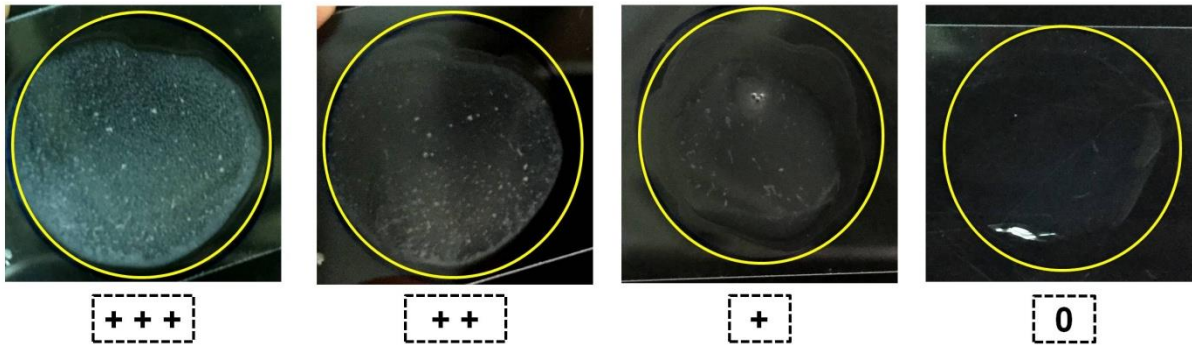

**Figure S5. The criteria used for scoring of agglutination/clumps formation of *S. aureus* in the presence and absence of UM-C162.** Each tested sample was given a score of +++, ++, + or 0 depending on the macroscopic clumps observed on the slides. A score of 0 represents no clumping activity whilst score +, ++ and +++ indicate the degree of clumps formation in ascending order.

**Table S3. Primer sequences used for quantitative RT-PCR analysis.**

| <b>Gene</b>                | <b>Forward sequence (5' to 3')</b> | <b>Reverse sequence (5' to 3')</b> | <b>References</b> |
|----------------------------|------------------------------------|------------------------------------|-------------------|
| <b>Housekeeping gene</b>   |                                    |                                    |                   |
| 16s rRNA                   | GGGACCCGCACAAGCGGTGG               | GGGTTGCGCTCGTTGCGGGA               | 1                 |
| <b>Upregulated genes</b>   |                                    |                                    |                   |
| SAOUHSC_01311              | AAACTTTCTGGTGGTCAACAACG            | AGTGCGATGTATAGAGTATCGTTTCG         | This study        |
| SAOUHSC_01312              | TGAATGGCGCCAAAGATTAATGG            | ACTGCACTCATTGCAACACCT              | This study        |
| SAOUHSC_01626              | CTGGCATGACTGGTGCAGAA               | ATCGTACGAGCCAGCATTGG               | This study        |
| SAOUHSC_01966              | GGCAATGGTATCAATCGGGACT             | CACAGGCAAAGCAACCATCAC              | This study        |
| SAOUHSC_02646              | AGGCGTCGTCTTTTTCCTTGG              | CCGGCAAGCATTGCTAAAGG               | This study        |
| <b>Downregulated genes</b> |                                    |                                    |                   |
| <i>saeR</i>                | CTGCCAAAACACAAGAACATGATAC          | CTTGGACTAAATGGTTTTTTTGACATAGT      | 2                 |
| <i>clfA</i>                | ACCCAGGTTTCAGATTCTGGCAGCG          | TCGCTGAGTCGGAATCGCTTGCT            | 1                 |
| <i>clfB</i>                | AACTCCAGGGCCGCCGGTTG               | CCTGAGTCGCTGTCTGAGCCTGAG           | 1                 |
| <i>eno</i>                 | TGCCGTAGGTGACGAAGGTGGTT            | GCACCGTGTTTCGCCTTCGAACT            | 1                 |
| <i>gyrB</i>                | AGTAACGGATAACGGACGTGGTA            | CCAACACCATGTAAACCACAGAT            | 3                 |
| <i>arcA</i>                | GTGGTTGACTCATACATCTAGGGC           | AGACCAGGCGTTGTAGTGACTTA            | 3                 |
| <i>sbi</i>                 | ATACATCAAACATTACGCGAACAC           | CTGGGTTCTTGCTGTCTTTAAGTG           | 2                 |

## References

- 1 Atshan, S. S. *et al.* Quantitative PCR analysis of genes expressed during biofilm development of methicillin resistant *Staphylococcus aureus* (MRSA). *Infect Genet Evol* **18**, 106-112, doi:10.1016/j.meegid.2013.05.002 (2013).
- 2 Voyich, J. M. *et al.* The SaeR/S gene regulatory system is essential for innate immune evasion by *Staphylococcus aureus*. *J Infect Dis* **199**, 1698-1706, doi:10.1086/598967 (2009).
- 3 Beenken, K. E. *et al.* Global gene expression in *Staphylococcus aureus* biofilms. *J Bacteriol* **186**, 4665-4684, doi:10.1128/JB.186.14.4665-4684.2004 (2004).
